# Supplementary material for: Establishment of a gut-on-a-chip device with controllable oxygen gradients to study the contribution of Bifidobacterium bifidum to inflammatory bowel disease
Source: Royal Society of Chemistry journal article supplement (doi:10.1039/d2bm01490d), 2023-01-01
Supplement: d2bm01490d2.pdf [file d2bm01490d2.pdf]

Establishment of gut-on-a-chip with controllable oxygen gradients to study the  
contribution of *Bifidobacterium bifidum* to inflammatory bowel disease

Supplementary Table 1. Different channel heights ( $\mu\text{m}$ ) and volumetric flow rates ( $\mu\text{L/h}$ ) correspond to different linear flow rates ( $\mu\text{m/s}$ ) in the upper channels.

| Channel height ( $\mu\text{m}$ ) |       | Linear flow rates ( $\mu\text{m/s}$ ) at different volumetric flow rates ( $\mu\text{L/h}$ ) |                    |                    |                    |                    |
|----------------------------------|-------|----------------------------------------------------------------------------------------------|--------------------|--------------------|--------------------|--------------------|
| Upper                            | Lower | 30 $\mu\text{L/h}$                                                                           | 35 $\mu\text{L/h}$ | 40 $\mu\text{L/h}$ | 45 $\mu\text{L/h}$ | 50 $\mu\text{L/h}$ |
| 150                              | 150   | 56                                                                                           | 65                 | 74                 | 83                 | 96                 |
| 200                              | 150   | 42                                                                                           | 49                 | 56                 | 63                 | 69                 |
| 300                              | 150   | 28                                                                                           | 32                 | 37                 | 42                 | 46                 |
| 400                              | 200   | 21                                                                                           | 24                 | 28                 | 31                 | 35                 |
| 450                              | 200   | 19                                                                                           | 22                 | 25                 | 28                 | 31                 |
| 500                              | 200   | 17                                                                                           | 19                 | 22                 | 25                 | 28                 |
